# Supplementary material for: Multi-layer 3D printed dipeptide-based low molecular weight gels
Source: Royal Society of Chemistry journal article supplement (doi:10.1039/d2sm00663d), 2022-01-01
Supplement: d2sm00663d1.pdf [file d2sm00663d1.pdf]

## **Multi-Layer 3D Printed Low Molecular Weight Gels**

Max J. S. Hill<sup>a</sup> and Dave J. Adams<sup>a</sup>

<sup>a</sup> School of Chemistry, University of Glasgow, Glasgow, G12 8QQ, UK.

E-mail: [dave.adams@glasgow.ac.uk](mailto:dave.adams@glasgow.ac.uk)

## **Supporting Information**

## Sample holder

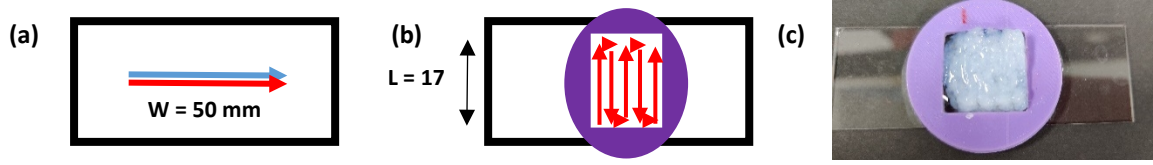

**Figure S1.** Schematic diagrams for printed (a) confocal and (b) rheological samples. (c) Example of gel 3D printed in custom holder.

## Rheology

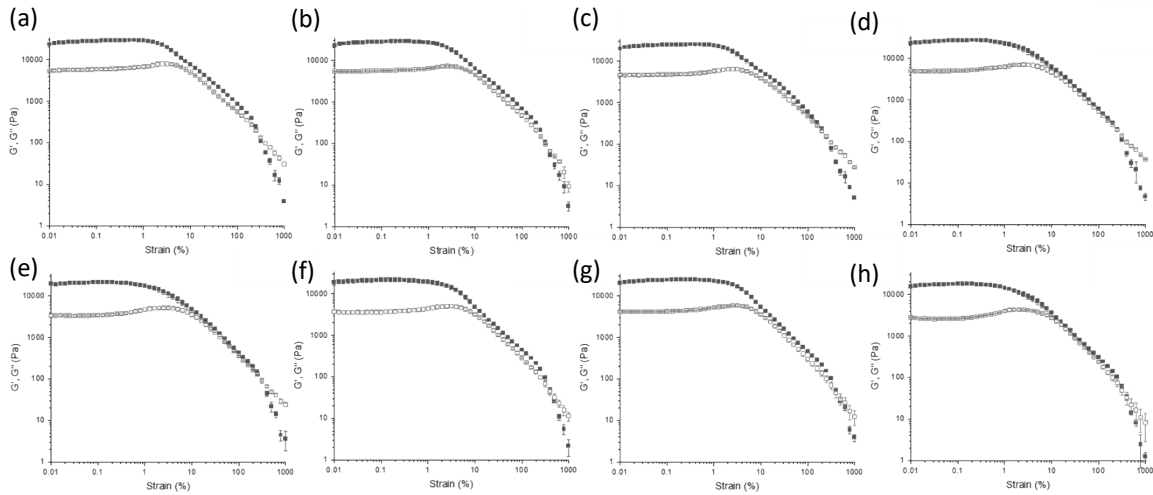

**Figure S2.** Strain sweeps for non-printed multi-layered gel samples (a) 1 (b) 2 (c) 3 (d) 4 (e) 5 (f) 6 (g) 7 (h) 8.  $G'$  is represented by filled shapes and  $G''$  hollow shapes. Measurements were carried out on samples prepared in triplicate, with error bars representing the standard deviation derived from averaging the three subsequent results.

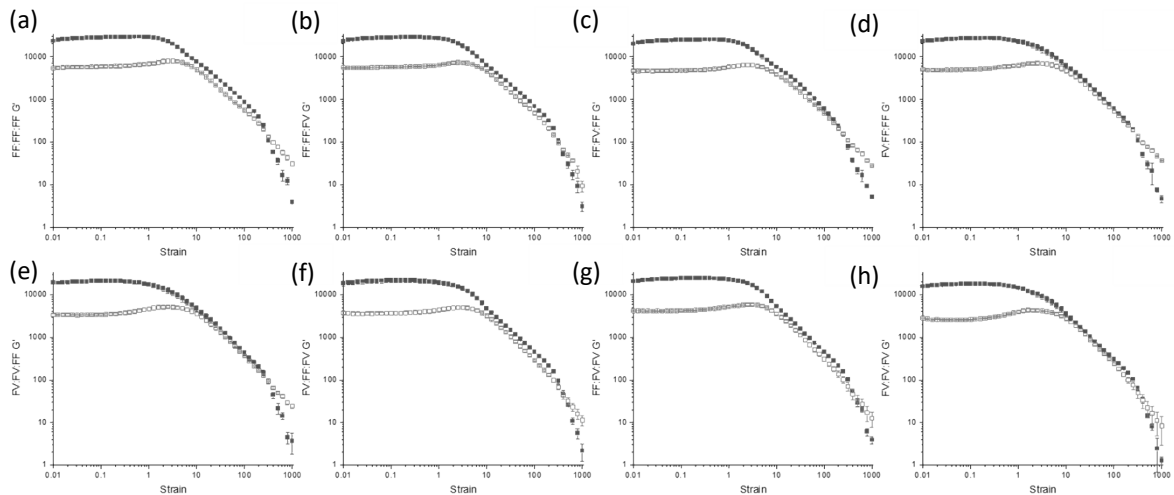

**Figure S3.** Strain sweeps for printed multi-layered gel samples (a) 1 (b) 2 (c) 3 (d) 4 (e) 5 (f) 6 (g) 7 (h) 8.  $G'$  is represented by filled shapes and  $G''$  hollow shapes. Gels were printed at  $4 \mu\text{L}/\text{mm}$  and a shear rate ( $\dot{\gamma}$ ) of  $1500 \text{ s}^{-1}$ . Measurements were carried out on samples prepared in triplicate, with error bars representing the standard deviation derived from averaging the three subsequent results.

### Confocal microscopy

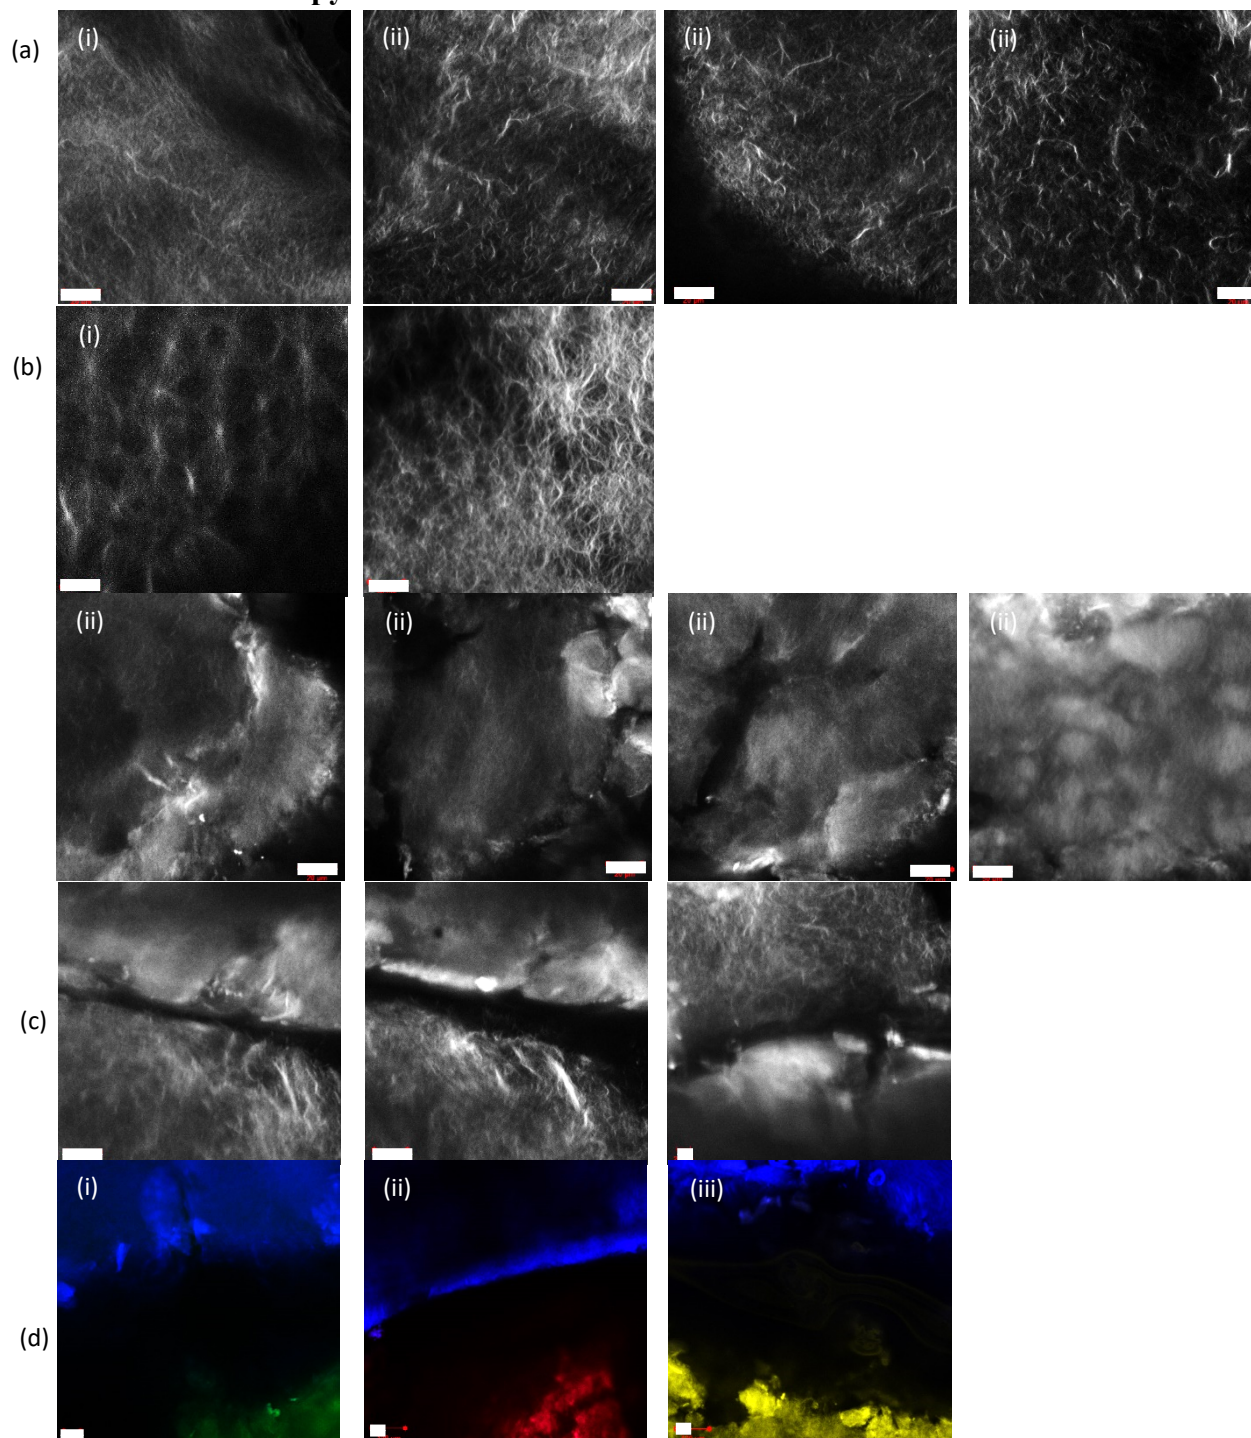

**Figure S4.** (a) and (b) show confocal microscopy images of (i) unprinted and (ii) printed (4  $\mu\text{L}/\text{mm}$ ), (a) 2NapFV and (b) FmocFF gels (5 mg/mL,  $\phi$  DMSO 0.2). (c) and (d) show confocal microscopy images of 2NapFV (top) and FmocFF (bottom) gels (5 mg/mL,  $\phi$  DMSO 0.2) printed (4  $\mu\text{L}/\text{mm}$ ) alongside one another with Nile Blue (top) and (c) Nile Blue, (d) (i) Fluorescein, (ii) Nile Red and (iii) Thioflavin T (bottom) dyes incorporated. Black and white images show gels only containing Nile Blue dye. All dyes were incorporated at 2  $\mu\text{L}/\text{mL}$  at 0.1 wt%. Scale bars (white) represent 20  $\mu\text{m}$ .
